# Supplementary material for: Laparoscopic versus open adhesiolysis for small bowel obstruction - a multicenter, prospective, randomized, controlled trial
Source: Springer Nature journal article supplement (doi:10.1186/1471-2482-14-77), 2014-10-11
Supplement: 12893_2014_517_MOESM2_ESM.pdf [file 12893_2014_517_MOESM2_ESM.pdf]

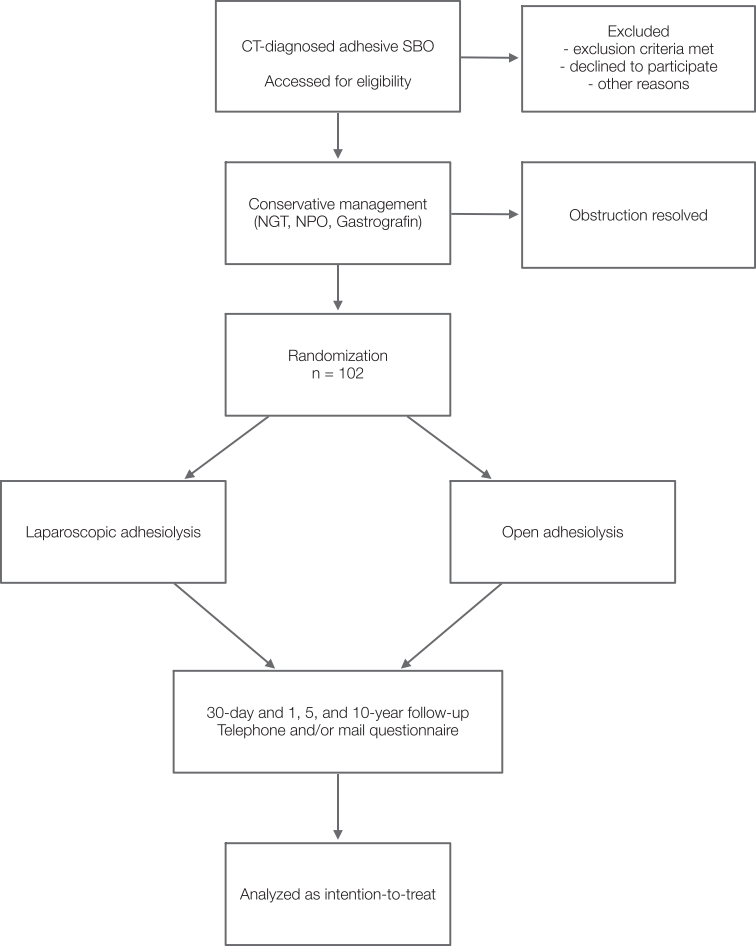

CT-diagnosed adhesive SBO  
Accessed for eligibility

Excluded  
- exclusion criteria met  
- declined to participate  
- other reasons

Conservative management  
(NGT, NPO, Gastrografin)

Obstruction resolved

Randomization  
n = 102

Laparoscopic adhesiolysis

Open adhesiolysis

30-day and 1, 5, and 10-year follow-up  
Telephone and/or mail questionnaire

Analyzed as intention-to-treat
